# Supplementary material
Source: publisher site journal article supplement (https://www.spandidos-publications.com/2638/downloadSupplementary)
Supplement: Supplementary file 1 [file downloadSupplementary]

Video S1. Steatotic liver transplantation displayed poor hepatic morphology following reperfusion compared with the normal graft transplantation.
